# Supplementary material
Source: Research Square preprint supplement (doi:10.21203/rs.3.rs-9455647/v1)
Supplement: Supplementary file 1 [file 7ad23a1235f7e49085c7d08a.docx]

# LIST OF APPENDICES

**Appendix 1: Data charting form**

| **Data Category/Items** | **Description** |
| --- | --- |
| **1. Study ID** | This was to label the studies for easy analysis |
| **2. Study detail** | Author(s), Title, Journal, DOI or URL |
| **3. Citation year** | Year which the study was published |
| **4. Title of the publication** | This was the title of the publication |
| **5. Source** | Name of journal and/or source of the publication |
| **6. Study Design** | Type of study (e.g., qualitative, quantitative, mixed-methods, RCT, ethnographic, etc.) |
| **7. Country** | Country/countries in Africa where the study was conducted |
| **8. Population Description** | Description of adult population (e.g., parents, caregivers, community members healthcare workers, religious leaders etc.) |
| **9. Sample Size** | Total number of participants in the given study |
| **10. Key Findings including behavioral outcomes and any framework used** | Summary of key results or conclusions as reported by the authors. Vaccine acceptance, hesitancy, refusal, actual uptake. Whether the study used any theoretical framework (e.g., WHO SAGE Matrix, HBM, Theory of Planned Behavior); if not, note how determinants were  structured |

**Appendix 2: Preferred Reporting Items for Systematic Reviews and Meta-Analyses Extension for Scoping Reviews (PRISMA-SCR) Checklist**

| **SECTION** | **ITEM** | **PRISMA-ScR CHECKLIST ITEM** | **REPORTED**  **ON PAGE #** |
| --- | --- | --- | --- |
| **TITLE** | | | |
| Title | 1 | Identify the report as a scoping review. | Cover Page |
| **ABSTRACT** | | | |
| Structured summary | 2 | Provide a structured summary that includes (as applicable): background, objectives, eligibility criteria, sources of evidence, charting methods, results, and conclusions that relate to the review questions and objectives. | 1 |
| **INTRODUCTION** | | | |
| Rationale | 3 | Describe the rationale for the review in the context of what is already known. Explain why the review questions/objectives lend themselves to a scoping review approach. | 9 |
| Objectives | 4 | Provide an explicit statement of the questions and objectives being addressed with reference to their key elements (e.g., population or participants, concepts, and context) or other relevant key elements used to conceptualize the review questions and/or objectives. | 10 |
| **METHODS** | | | |
| Protocol and registration | 5 | Indicate whether a review protocol exists; state if and where it can be accessed (e.g., a Web address); and if available, provide registration information, including the registration number. | N/A |
| Eligibility criteria | 6 | Specify characteristics of the sources of evidence used as eligibility criteria (e.g., years considered, language, and publication status), and provide a rationale. | 14 |

| Information sources* | 7 | Describe all information sources in the search (e.g., databases with dates of coverage and contact with authors to identify additional sources), as well as the date the most recent search was executed. | 15 |
| --- | --- | --- | --- |
| Search | 8 | Present the full electronic search strategy for at least 1 database, including any limits used, such that it could be repeated. | 15 |
| Selection of sources of evidence† | 9 | State the process for selecting sources of evidence (i.e., screening and eligibility) included in the scoping review. | 15/16 |
| Data charting process‡ | 10 | Describe the methods of charting data from the included sources of evidence (e.g., calibrated forms or forms that have been tested by the team before their use, and whether data charting was done independently or in duplicate) and any processes for obtaining and confirming data from investigators. | 16 |
| Data items | 11 | List and define all variables for which data were sought and any assumptions and simplifications made. | Appendix 1 |
| Critical appraisal of individual sources of evidence§ | 12 | If done, provide a rationale for conducting a critical appraisal of included sources of evidence; describe the methods used and how this information was used in any data synthesis (if appropriate). | 19 |
| Synthesis of results | 13 | Describe the methods of handling and summarizing the data that were charted. | 19 |
| **RESULTS** | | | |
| Selection of sources of evidence | 14 | Give numbers of sources of evidence screened, assessed for eligibility, and included in the review, with reasons for exclusions at each stage, ideally using a flow diagram. | 20 |
| Characteristics of sources of evidence | 15 | For each source of evidence, present characteristics for which data were charted and provide the citations. | 21 |
| Critical appraisal within sources of evidence | 16 | A formal critical appraisal was not conducted as part of this scoping review.  The focus was on summarizing the scope of existing evidence rather than assessing the quality of  individual studies | N/A |

| Results of individual sources of evidence | 17 | For each included source of evidence, present the relevant data that were charted that relate to the review questions and objectives. | Appendix 4,  21 |
| --- | --- | --- | --- |
| Synthesis of results | 18 | Summarize and/or present the charting results as they relate to the review questions and objectives. | Appendix 5 |
| **DISCUSSION** | | | |
| Summary of evidence | 19 | Summarize the main results (including an overview of concepts, themes, and types of evidence available), link to the review questions and objectives, and consider the relevance to key groups. | 26 |
| Limitations | 20 | Discuss the limitations of the scoping review process. | 29 |
| Conclusions | 21 | Provide a general interpretation of the results with respect to the review questions and objectives, as well as potential implications and/or next steps. | 31 |
| **FUNDING** | | | |
| Funding | 22 | Describe sources of funding for the included sources of evidence, as well as sources of funding for the scoping review. Describe the role of the funders of the scoping review. | N/A |

### Appendix 3: Scoping Review of Factors Influencing Adult Acceptance of Malaria Vaccines in Africa (2019-2025)

| **ID** | **Authors** | **Year** | **Title** | **Study Design** | **Country** | **Population** | **Sample Size** | **Key Findings** |
| --- | --- | --- | --- | --- | --- | --- | --- | --- |
| S1 | Njoh et al. | 2025 | Malaria vaccine acceptance & associated factors in Cameroon: A nationwide cross-sectional  survey | Nationwide cross- sectional survey | Cameroon | Adults | 2025 | Factors that favored vaccine acceptance included a history of severe malaria, awareness of the availability of the malaria vaccine for infants, & working in the vaccination service. Elements reported for vaccine hesitancy included fear of unsafe & negative rumors about the vaccine. |
| S2 | Olumide et al. | 2025 | Awareness, Acceptability & Factors Influencing Malaria Vaccine Uptake Among Caregivers of Children Under 5 in  South-Western Nigeria | Hospital- based Cross- sectional study | Nigeria | Caregivers (parents & legal guardians) of children under 5 | 797 | Low awareness (26%) but high willingness to accept (90%) & pay for (82.1%) the RTS,S vaccine. Higher education (tertiary) increased awareness. Health education by providers critical for uptake. |
| S3 | Adigwe & Onavbavba | 2025 | Acceptance & Affordability of Malaria Vaccines: Issues Relating to Hesitancy & Willingness to Pay Amongst Nigerian Parents  of Under-Five | National Cross- sectional survey | Nigeria | Married adults of children under 5 | 1413 | Concerns about safety & misinformation reduced acceptance. Willingness to pay influenced by income; free vaccines or incentives could increase uptake. |
| S4 | Diawara et al | 2025 | Acceptability of the R21/Matrix-M malaria vaccine alongside existing malaria interventions in the trial context | Qualitative study assessed in the Context of a phase III  trial | Mali | Caregivers, community members, CHWs & trial field staff | 137 | Acceptability of the vaccine was driven mainly by the high burden of malaria & a high level of trust & confidence in the trial & trial team. |
| S5 | Bam et al. | 2023 | Caregivers’ Perception & Acceptance of Malaria  Vaccine for Children | A descriptive qualitative  study | Ghana | Caregivers of children | 10 | Positive perceptions due to reduced hospital visits & cost savings influenced acceptance. Concerns about side effects; targeted health  education addressed hesitancy. |
| S6 | Bugase & Tindana | 2024 | Influence of Trust on the Acceptance of the RTS,S Malaria Vaccine in the Kassena-Nankana  Districts of Ghana | Explorative cross- sectional mixed-  method study | Ghana | Mothers & caregivers of children under five years of age | 390 | Trust in healthcare providers & community engagement were key facilitators. Misinformation & distrust in external agencies reduced acceptance. |
| S7 | Nyalundja et al. | 2024 | Socio-Demographic Factors Influencing Malaria Vaccine Acceptance for Under- Five Children in a  Malaria-Endemic Region | Community- based cross- sectional study | Democratic Republic of Congo (DRC) | Adult caregivers | 1612 | Education, income, & access to healthcare influenced acceptance. Cultural beliefs & distance to facilities were barriers. |

| S8 | Alagbe et al. | 2023 | Awareness, Perceptions & Willingness to Accept Malaria Vaccines for Children Under Age 5 Among Mothers in  Northcentral Nigeria | Hospital- based cross- sectional observational study | Nigeria | Women of reproductive age | 376 | Low awareness but high willingness to accept. Fear of side effects, religious beliefs, & cost were barriers. Engaging trusted community figures & religious leaders improved acceptance. |
| --- | --- | --- | --- | --- | --- | --- | --- | --- |
| S9 | Mwingira et al. | 2025 | Knowledge & willingness towards malaria vaccines among caregivers in Dar es Salaam, Tanzania | Health facility-based cross- sectional  survey | Tanzania | Caregivers, community leaders | 293 | Awareness of the malaria vaccine was low. Despite low awareness, 92.8% of respondents expressed willingness to vaccinate their children under 5, indicating high potential acceptance despite limited exposure to vaccine information. |
| S10 | Adjei et al. | 2023 | Post-Introduction Evaluation of the Malaria Vaccine Implementation Programme in Ghana, 2021 | Mixed- methods, post- introduction evaluation | Ghana | Key Decision makers, EPI Coordinators & focal persons, Caregivers, health  workers | 175 | Initial reluctance due to low awareness & safety concerns; improved through health education & community mobilization. High uptake after addressing concerns, but logistical issues persisted. |
| S11 | Simbeye et al. | 2024 | Factors Associated with Malaria Vaccine Uptake  in Nsanje District, Malawi | Cross- sectional  study | Malawi | Mothers/Caregiver s of children 24-36  months | 410 | Complex dosing schedule, & distance to facilities were barriers. Health education & community health worker reminders increased acceptance. |
| S12 | Ajayi & Emeto | 2023 | Awareness & acceptability of malaria vaccine among caregivers of under-5 children in Northern  Nigeria | Community- based cross- sectional survey | Nigeria | Caregivers of under-five children | 504 | Acceptance of the malaria vaccine was significantly associated with prior awareness of the new malaria vaccine & having previous experience with other childhood vaccinations. |
| S13 | Asmare Getachew | 2022 | Willingness to accept malaria vaccine among caregivers of under-5 children in Southwest Ethiopia: a community based cross-sectional  study | Community- based cross- sectional study | Ethiopia | Caregivers of under-five children | 406 | The willingness to accept a malaria vaccine for children among caregivers was low. Marital status, knowledge & previous experience with childhood vaccination were found to be significantly associated with willingness to accept a malaria vaccine for their children. |
| S14 | Bongomin et al | 2024 | Malaria vaccine acceptance among next of kin of children under  5 years of age in Gulu, northern Uganda in 2023: a community-based study | Cross- sectional study | Uganda | Adults with children 5 years or younger | 432 | Factors associated with acceptance were knowing a child who died of malaria & preferring the injection route for a malaria vaccine. |
| S15 | Chinawa et al | 2024 | Willingness to accept malaria vaccines amongst women presenting at outpatient &  immunization clinics in | Cross- sectional study | Nigeria | Mothers | 491 | Majority of the respondents were willing to vaccinate baby with the malaria vaccine showing acceptance, while many were willing to vaccinate self & baby with the malaria vaccine. |

|  |  |  | Enugu state, Southeast  Nigeria |  |  |  |  |  |
| --- | --- | --- | --- | --- | --- | --- | --- | --- |
| S16 | Emmanuel et al | 2024 | Evaluating the knowledge, attitude, perception, & readiness of caregivers of under 5-year-old children to accept malaria vaccine  in Nigeria | Cross- sectional study | Nigeria | Caregivers of under-five children | 347 | A good number of participants, demonstrated strong readiness to accept the malaria vaccine. The study showed that fear of adverse effects was the main reason for malaria vaccine resistance among caregivers. |
| S17 | Hussein et al | 2024 | Hesitancy towards R21/Matrix-M malaria vaccine among Ghanaian parents & attitudes towards immunizing non-  eligible children: a cross- sectional survey | Cross- sectional study | Ghana | Parents | 765 | The following predictors were associated with Vaccine Hesistancy: working in the healthcare sector, having the other parent working in the healthcare sector & not taking scheduled routine vaccinations. |
| S18 | Immurana et al | 2022 | Determinants of willingness to accept child  vaccination against malaria in Ghana | Cross- sectional study | Ghana | Women aged 15-  49 residing in selected households | 3004 | Religion, region of residence & awareness of the malaria vaccine, influence acceptance. children aged five years & below in a household, influenced hesitancy. |
| S19 | Kabir Sulaiman et al | 2023 | Prevalence, determinants, & reasons for malaria vaccine hesitancy among caregivers of under-five children in Nigeria:  Results from a nationwide cross-sectional survey | Cross- sectional study | Nigeria | Adult residents  (> = 18 years) who care for children under five | 3377 | Hesitancy reasons included fear of vaccine adverse effects, availability of other malaria preventive measures & not seeing the positive effect of the vaccine in others first. |
| S20 | Röbl et al | 2023 | Caregiver acceptance of malaria vaccination for children under 5 years of age & associated factors: cross-sectional household  survey, Guinea & Sierra Leone, 2022 | Cross- sectional household survey | Guinea & Sierra Leone | Caregivers for children under 5 years of age | 702 | In both countries, acceptance was lower in remote areas than in urban areas. Better knowledge of the cause of malaria infection was associated with increased acceptance. |
| S21 | Wagnew et al | 2021 | Willingness to Pay for Childhood Malaria Vaccine Among Caregivers of Under-Five  Children in Northwest Ethiopia | Cross- sectional study | Ethiopia | Caregivers of under-five children | 604 | Overall, many caregivers of under-five children were willing to pay for the vaccine which transcends to acceptance of the vaccine. |

| S22 | Yeboah et al | 2022 | Predictors of malaria vaccine uptake among children 6-24 months in the Kassena Nankana Municipality in the Upper East Region of Ghana | Cross- sectional study | Ghana | Mothers/caregivers with children aged 6 to 24 months | 422 | Malaria vaccine uptake was high; however, dose four uptake coverage by age two was low. This indicated that mothers/caregivers did not understand the notion of immunization throughout the second year of life. |
| --- | --- | --- | --- | --- | --- | --- | --- | --- |
| S23 | Tabiri et al | 2021 | Factors associated with malaria vaccine uptake in Sunyani Municipality, Ghana | Cross- sectional study | Ghana | Parents/caregivers with children eligible to have taken the first three doses of the malaria vaccine by  December 2019 | 424 | Children with a parent who had been educated up to the tertiary level had increased acceptance rates. Parents whose children had experienced fever as an adverse reaction were more likely to accept. |
| S24 | Hoyt et al | 2023 | RTS,S/AS01 malaria vaccine pilot implementation in western Kenya: a qualitative longitudinal study to  understand immunisation barriers & optimise uptake | Qualitative longitudinal study | Kenya | Caregivers with a malaria vaccine eligible child | 63 | Lack of awareness, previous negative experiences with routine childhood immunisations & the burden of getting to the health facility contributed to hesitance. Over time concerns about vaccine side effects diminished & anticipated vaccination benefits strongly motivated caregivers to vaccinate their children. |
| S25 | WHO | 2021 | Full Evidence Report on the RTS,S/AS01 Malaria Vaccine | Background Paper | Malawi, Ghana & Kenya | General public, policymakers | N/A | In general, care givers & health care providers had positive attitudes towards the vaccine.  Despite RTS,S/AS01 being a new vaccine delivered through EPI & requiring an expanded  schedule, reasonably high coverage of the first three doses was achieved in all three pilot  countries. |
| S26 | WHO | 2023 | 18 Million Doses of First- Ever Malaria Vaccine Allocated to 12 African  Countries for 2023-2025: Gavi, WHO & UNICEF | Policy report | Multiple (12 countries) | General public, policymakers | N/A | High demand for RTS,S vaccine; acceptance influenced by equitable allocation to high-risk areas. Community engagement critical for rollout success. |

| S27 | GAVI | 2022 | Gavi Board Approves Funding to Support  Malaria Vaccine Roll-Out in Sub-Saharan Africa | Policy report | Multiple (Africa- wide) | Policymakers, general public | N/A | Funding & logistical support increased access, but public acceptance varied due to misinformation & cultural barriers. |
| --- | --- | --- | --- | --- | --- | --- | --- | --- |
| S28 | WHO | 2024 | Life-Saving Malaria Vaccines Reach Children in 17 Endemic Countries in 2024 | Policy report | Multiple (17 countries, including Cameroon, Ghana,  Malawi) | General public, policymakers | N/A | Community engagement workshops in Cameroon, Ghana, & Malawi improved acceptance through demand promotion & addressing misinformation. Logistical challenges (e.g., cold chain) & hesitancy due to safety concerns were barriers. |
| S29 | GAVI, WHO & UNICEF | 2023 | Shipments to African Countries Herald Final Steps Toward Broader Vaccination Against  Malaria: Gavi, WHO & UNICEF | Policy report | Cameroon, Burkina Faso, Liberia,  Niger, Sierra Leone | General public, policymakers | N/A | High willingness in Cameroon, but fears of being “guinea pigs” reduced acceptance. Community trust & free vaccines were facilitators.  Logistical barriers (e.g., storage) noted. |
| S30 | Tina S. Mehnpaine, GAVI | 2024 | Communities in rural Liberia welcome malaria vaccine roll-out | Article | Liberia | General public, policymakers | N/A | Limited knowledge of the vaccine & citizens' trust were hurdles to acceptance |

***Note: S1-S24: Study ID for all the peer-reviewed articles & S25-S30: Study ID for grey literature***

**Appendix 4: Synthesis table of the Thematic Content Analysis**

| **Domain** | **Theme** | **HBM Construct** | **Facilitators with Study References** | **Barriers with Study References** | **Number and % of References Supporting Theme** |
| --- | --- | --- | --- | --- | --- |
| **Contextual**  **Influences factors** | Socio-economic and Political factors | Cues to Action, Perceived Barriers | Equitable vaccine allocation funding increased access in 12 countries (e.g., Cameroon, Liberia;  (WHO, 2023a); (GAVI, 2025); (WHO, 2023b)). | Distrust in government or external agencies (e.g., "Western-driven agendas") reduced acceptance in Ghana ((Bugase & Tindana, 2024), and Nigeria (Alagbe et al., 2025)). | 5 references;  16.7% (5/30) |
| Religion and culture | Perceived Barriers | -- | Cultural beliefs (e.g., fatalism reliance on traditional medicine hindered uptake in DRC (Nyalundja et al., 2024)) and Nigeria (Adigwe & Onavbavba, 2025)); religious opposition lowered acceptance as seen in this studies (Alagbe et al., 2025)), (Njoh et al., 2025) and  (Immurana et al., 2022) | 4 references; 13.3% (4/30) |
| Information environment | Cues to Action | Community engagement workshops and trusted figures (e.g., religious leaders) countered misinformation, boosting acceptance in countries like Cameroon, Ghana, Malawi (WHO, 2024a), (Alagbe et al.,  2025). | Misinformation (e.g., infertility "guinea pig" fears) reduced uptake by 20–30% in Cameroon (S29 (WHO, 2023b), Nigeria (Adigwe & Onavbavba, 2025), (Kabir Sulaiman et al., 2023), and Ghana (Bugase & Tindana, 2024). | 5 references; 16.7% (5/30) |
| Geopolitical context | Perceived Barriers | -- | Lower acceptance in rural vs. urban areas (e.g., Guinea, Sierra Leone) due to limited information and access (Röbl et al., 2023). | 1 reference;  3.3% (1/30) |
| **Individual and Group Influences** | Knowledge and awareness | Perceived Susceptibility/Bene fits | Higher education (tertiary level) and health education by providers increased acceptance by 15–25% in Nigeria (Olumide et al., 2025); (Ajayi & Emeto, 2023), Cameroon (Njoh et al., 2025)), and Sierra Leone (Röbl et al., 2023). | Low awareness (14.7% in Tanzania, S9 (Mwingira et al., 2025); 26% in Nigeria, S2 (Olumide et al., 2025); 60% uptake in Malawi, (Simbeye et al., 2024)) limited acceptance | 6 references;  20.0% (6/30) |

|  | Risk perception | Perceived Severity | High perceived malaria threat (e.g., history of severe malaria) drove acceptance in Mali (Diawara et al., 2025), Cameroon (Njoh et al., 2025)) and Uganda (Bongomin et al., 2024). | Fear of side effects and low perceived malaria susceptibility reduced acceptance by 10–20% in Nigeria (Adigwe & Onavbavba, 2025), (Emmanuel et al., 2024), (Kabir Sulaiman et al., 2023)), Ghana (Bam et al., 2023)), Ethiopia (Asmare, 2022). | 7 references;  23.3% (7/30) |
| --- | --- | --- | --- | --- | --- |
| Trust and confidence | Perceived Benefits | Trust in healthcare providers and trial teams increased acceptance in Mali (Diawara et al., 2025), Ghana (Bugase & Tindana, 2024), (Hussein et al., 2024)), High willingness to vaccinate (e.g., 92.8% in Tanzania, (Mwingira et al., 2025); 90% in Nigeria (Olumide et al., 2025), (Chinawa et  al., 2024) | Preference for traditional medicine lowered trust in vaccines in DRC (Nyalundja et al., 2024)) and Nigeria (Alagbe et al., 2025)). Limited knowledge of the vaccine and citizens' trust (*Communities in Rural Liberia Welcome Malaria Vaccine Roll-Out*, 2024) were hurdles to acceptance. | 8 references,  26.7% (8/30) |
| Social norms | Cues to Action | Community leaders and peer influence promoted acceptance in Cameroon, (WHO, 2023b) Nigeria (Alagbe et al., 2025) and Ghana (Bugase & Tindana, 2024) where caregivers and health care providers had positive attitudes as well as towards the vaccine indicated strong potential for uptake with proper interventions  (WHO, 2021a). | Misinformation-driven social norms reduced uptake in Nigeria (Kabir Sulaiman et al., 2023). | 4 references;  13.3% (4/30) |
| **Vaccine/Vaccination specific issues** | Vaccine characteristics | Perceived Barriers | Positive experiences with mild side effects (e.g., fever) increased subsequent dose acceptance in Ghana (Tabiri et al., 2021). | Fear of side effects reduced uptake in Ghana (Bam et al., 2023), (Hussein et al., 2024)), Nigeria (Alagbe et al., 2025), (Emmanuel et al., 2024), (Kabir Sulaiman et al., 2023), and Kenya (Hoyt et al., 2023); complex four-dose schedule hindered uptake in Malawi (Simbeye  et al., 2024) and Ghana (Yeboah et al., 2022). | 7 references;  23.3% (7/30) |
| Delivery platform | Perceived Barriers | Community health worker support and reminders increased uptake by 10–20% in Ghana (Adjei et al., 2023)) and Malawi (Simbeye et al., 2024). | Distance to facilities and cold chain issues reduced access in Kenya (Hoyt et al., 2023), DRC (Nyalundja et al., 2024), Malawi (Simbeye et al., 2024), and Cameroon (WHO, 2024a), (WHO, 2023b). | 5 references;  16.7% (5/30) |

|  | Cost and incentives | Perceived Barriers/Benefits | Community health worker support and reminders increased uptake in Ghana (Adjei et al., 2023). Free vaccines and equitable distribution boosted acceptance in Cameroon and Liberia (WHO, 2023a), (WHO, 2023b); willingness to pay ( US$23.11) supported uptake in  Ethiopia (Wagnew et al., 2021) | Distance to facilities and cold chain issues reduced access in Malawi (Simbeye et al., 2024), DRC (Nyalundja et al., 2024), and Kenya (Hoyt et al., 2023). Furthermore, income-dependent affordability limited acceptance in Nigeria (Adigwe & Onavbavba, 2025). | 6 references;  20.0% (6/30) |
| --- | --- | --- | --- | --- | --- |
